# Supplementary material
Source: publisher site journal article supplement (https://www.dovepress.com/article/372981)

Supplementary Material for

**Sichen formula ameliorates lipopolysaccharide-induced  
acute lung injury via blocking the TLR4 signaling pathways**

Correspondence: Shuo-Feng Zhang (shuofengzhang@sina.com) and Yi Zhang (yizhang714@163.com).

This file includes the original blots with molecular weight markers.

# Blot of TLR4 in Fig.3B

TLR4 (95 kDa)

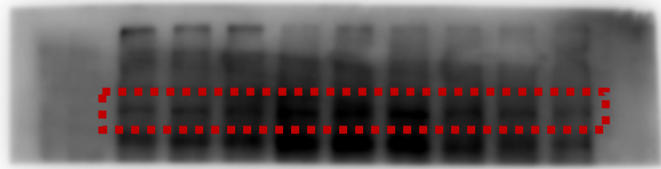

95 kDa-  
75 kDa-

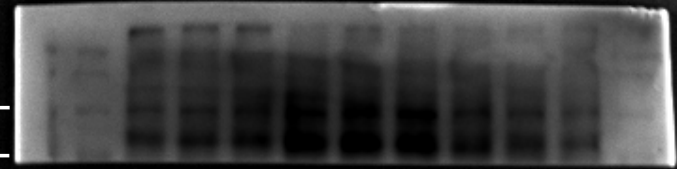

# Blot of $\beta$ -actin in Fig.3B

$\beta$ -actin (45 kDa)

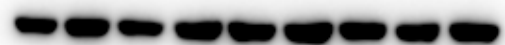

55 kDa-

43 kDa-

34 kDa-

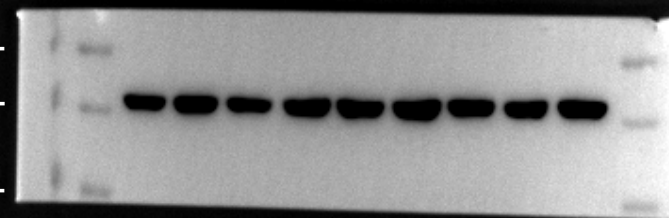

# Blot of p-p65 in Fig.3B

p-p65 (65 kDa)

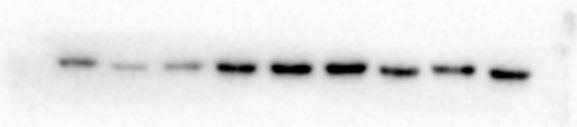

75 kDa-  
55 kDa-

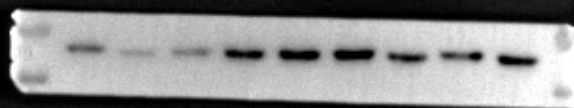



# Blot of p65 in Fig.3B

p65 (65 kDa)

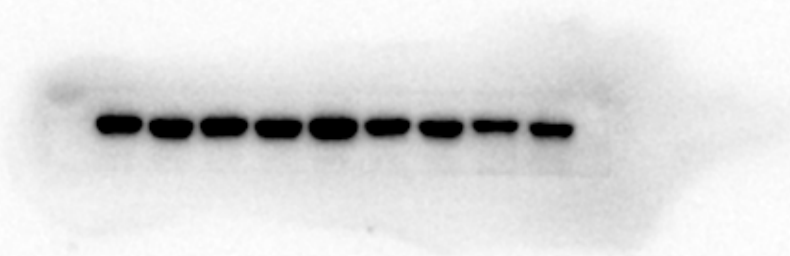

75 kDa-  
55 kDa-

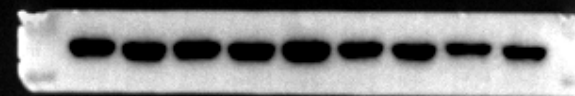

# Blot of $\beta$ -actin in Fig.3B

$\beta$ -actin (45 kDa)

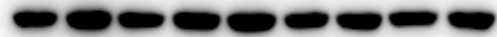

43 kDa-

34 kDa-

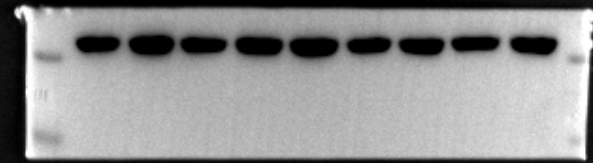

# Blot of iNOS in Fig.4D

iNOS (131 kDa)

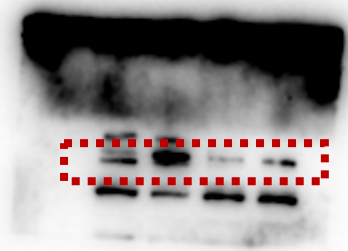

130 kDa-  
95 kDa-

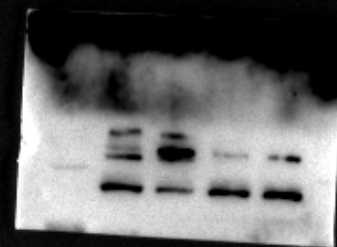

Blot of GAPDH for normalizing  
iNOS in Fig.4D

GAPDH (37 kDa)

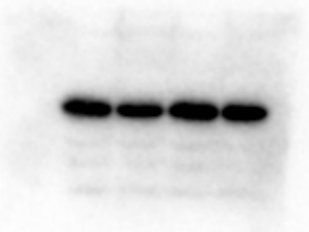

43 kDa-

26 kDa-

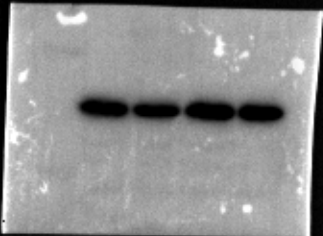



Blot of COX-2 in Fig.4D

COX-2  
(74 kDa)

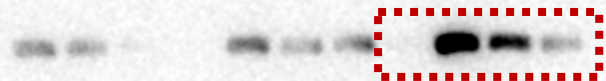

72 kDa-

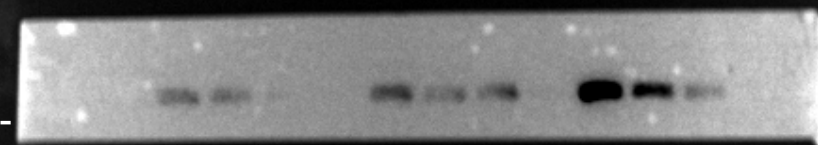

Blot of GAPDH for  
normalizing COX-2 in  
Fig.4D

GAPDH  
(37 kDa)

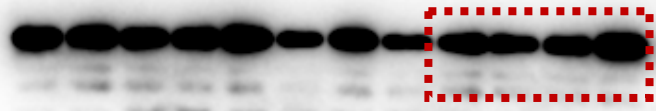

43 kDa-

26 kDa-

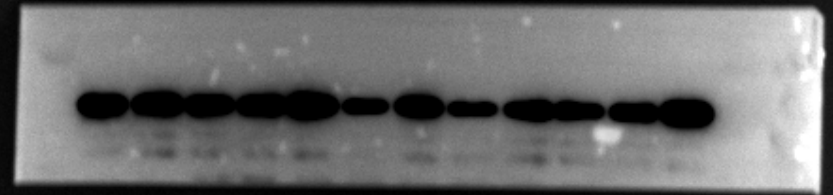

Blot of p-p38 in Fig.5A

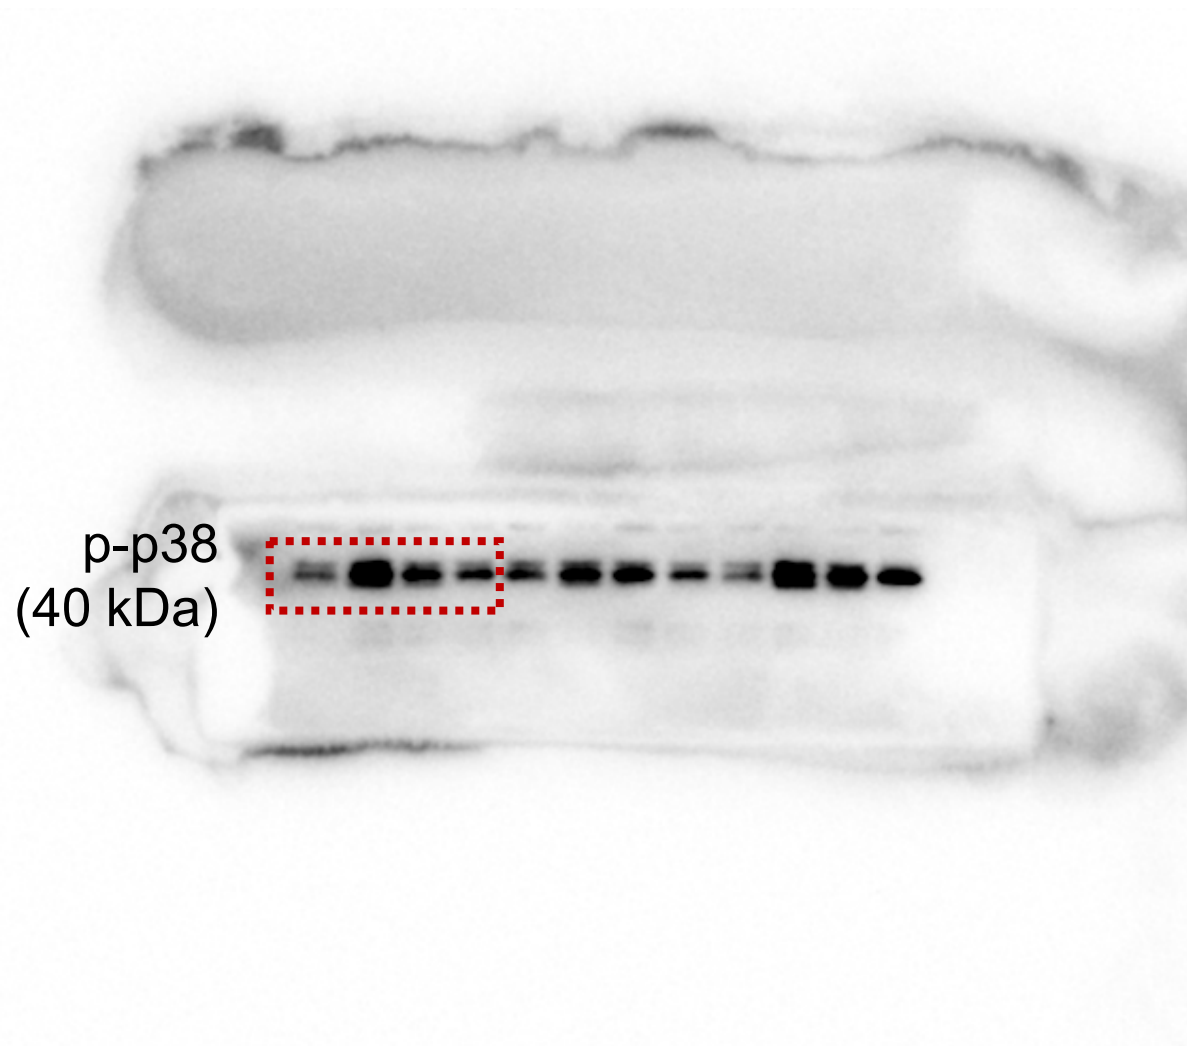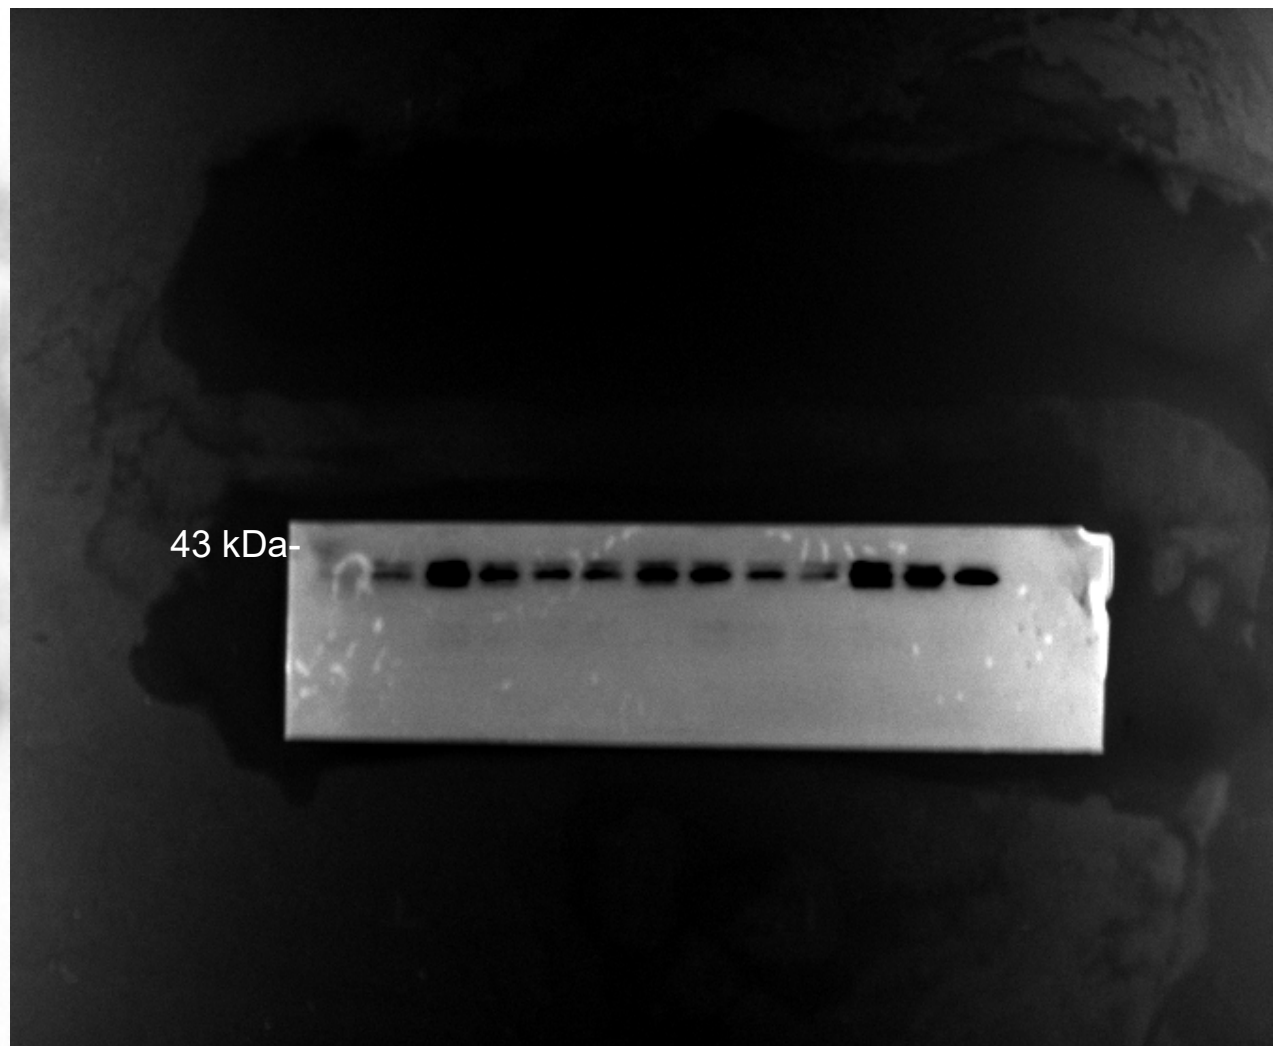



# Blot of p38 in Fig.5A

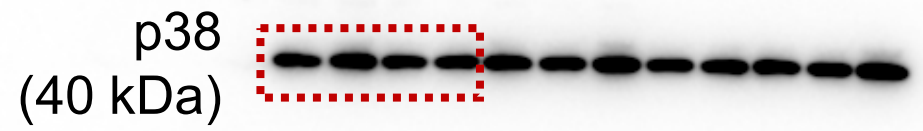

43 kDa-  
34 kDa-

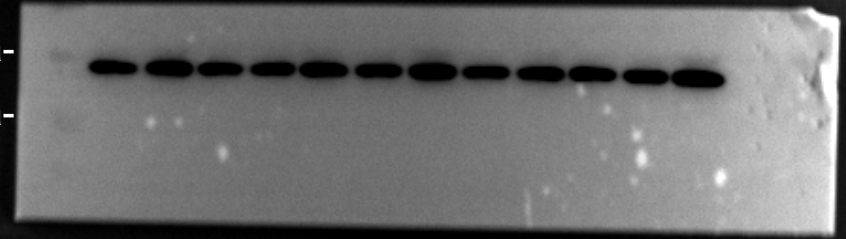

# Blot of p-ERK in Fig.5A

p-ERK  
(44/42 kDa)

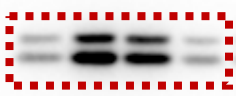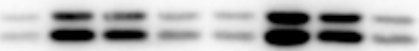

43 kDa-

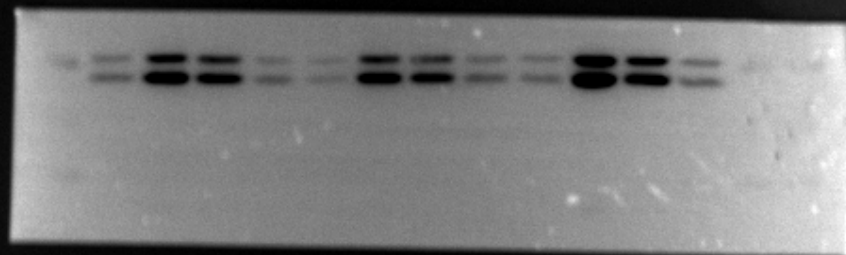

# Blot of ERK in Fig.5A

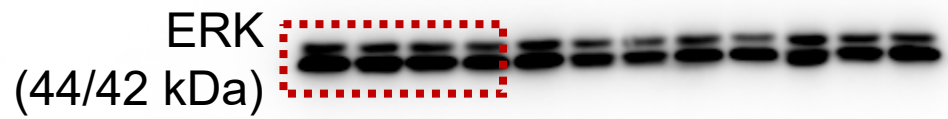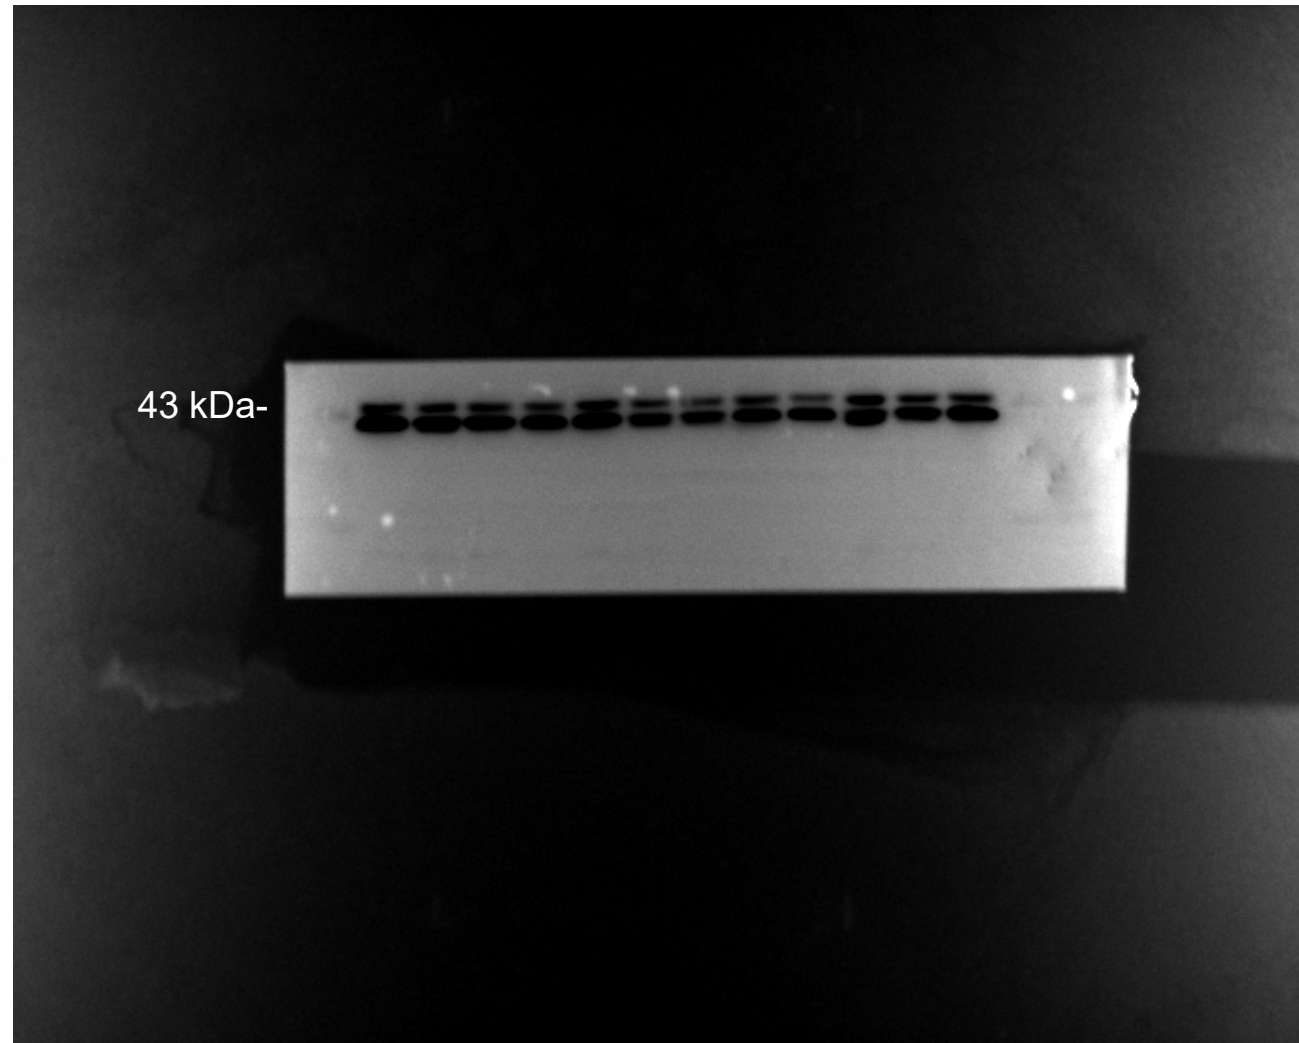

# Blot of p-JNK in Fig.5A

p-JNK (54/46 kDa)

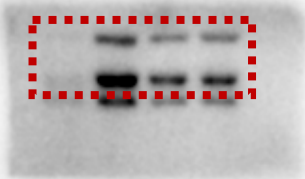

55 kDa-  
43 kDa-

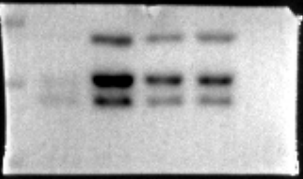



# Blot of JNK in Fig.5A

JNK (54/46 kDa)

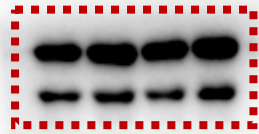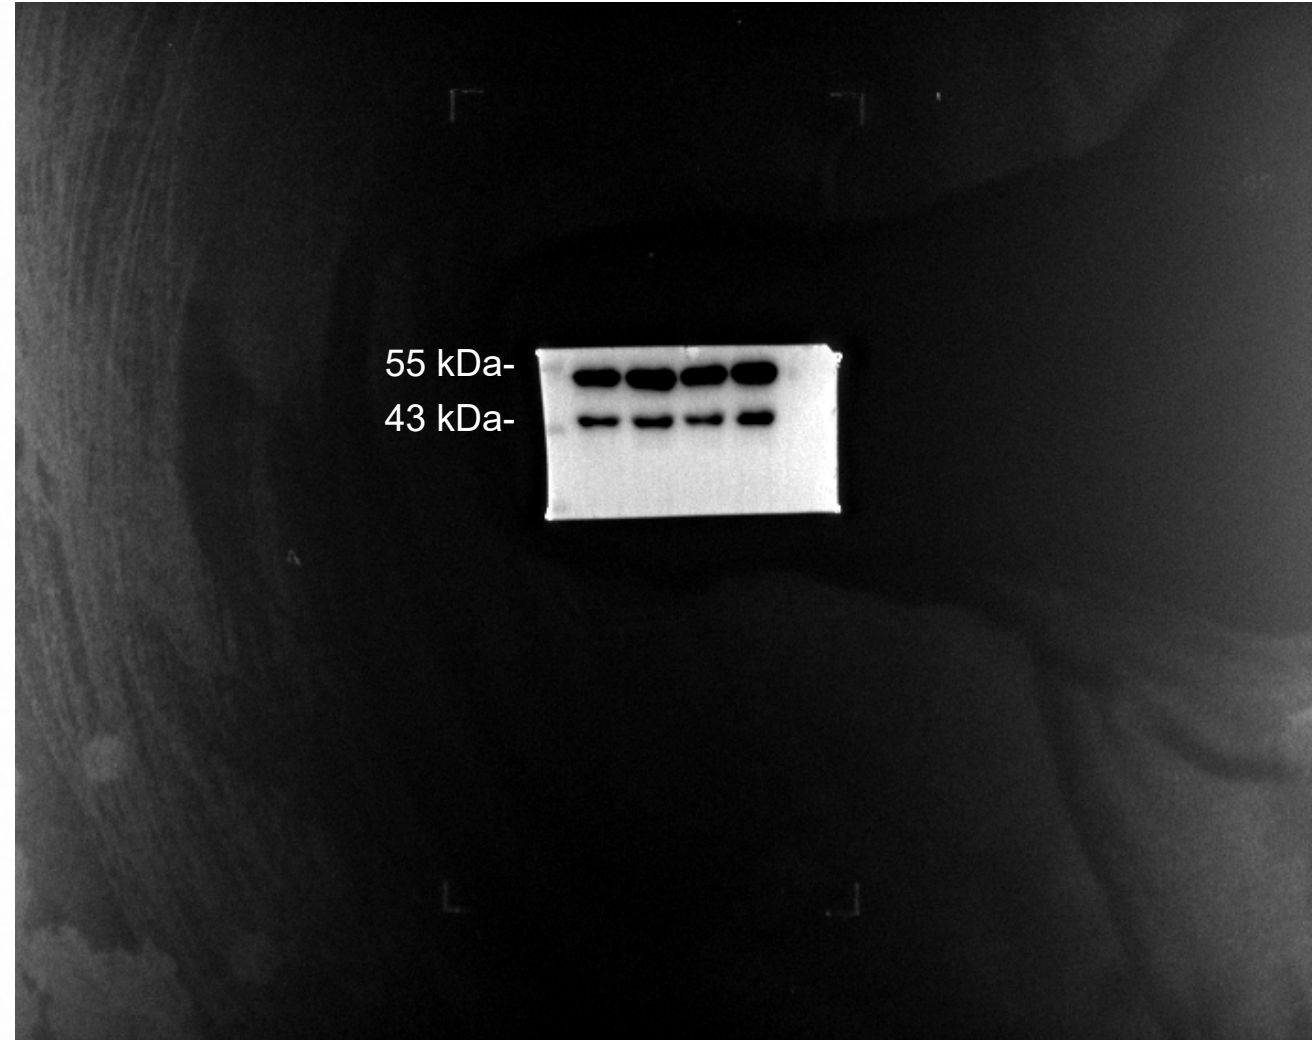

# Blot of p-c-Jun in Fig.5A

p-c-Jun  
(48 kDa)

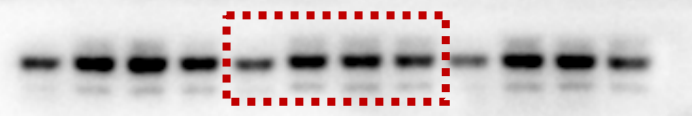

43 kDa-

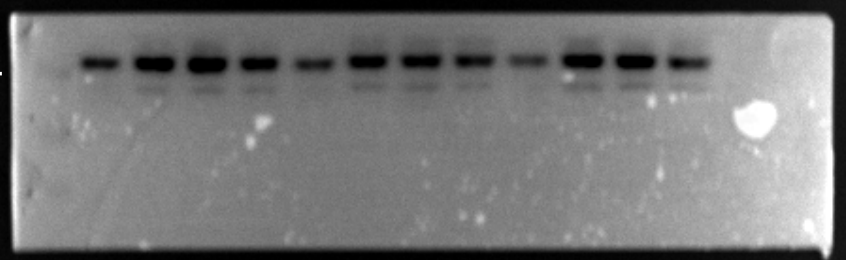

# Blot of c-Jun in Fig.5A

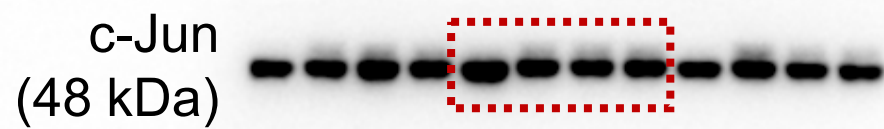

43 kDa-

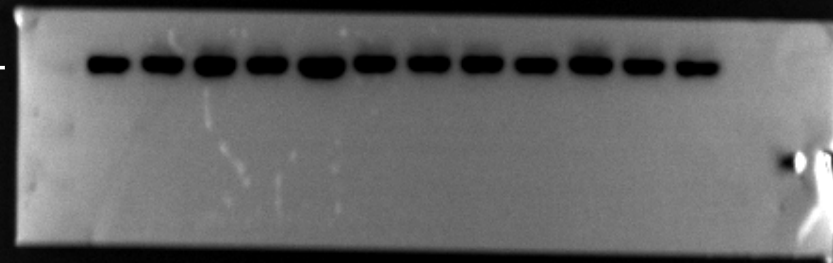



Blot of GAPDH (left) in Fig.5A

GAPDH  
(37 kDa)

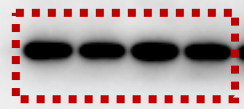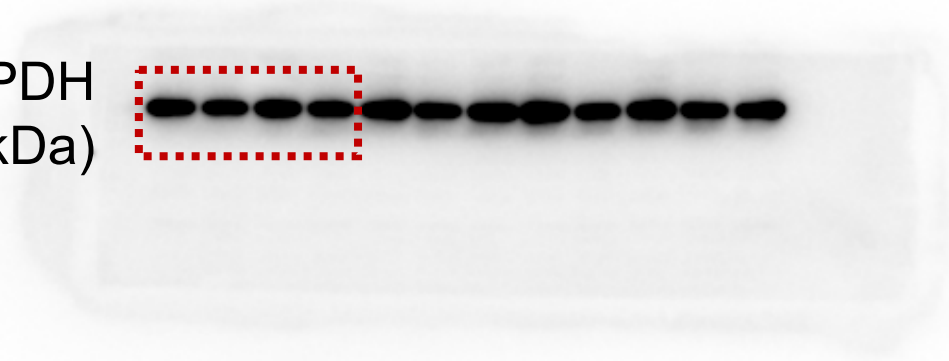

34 kDa-

26 kDa-

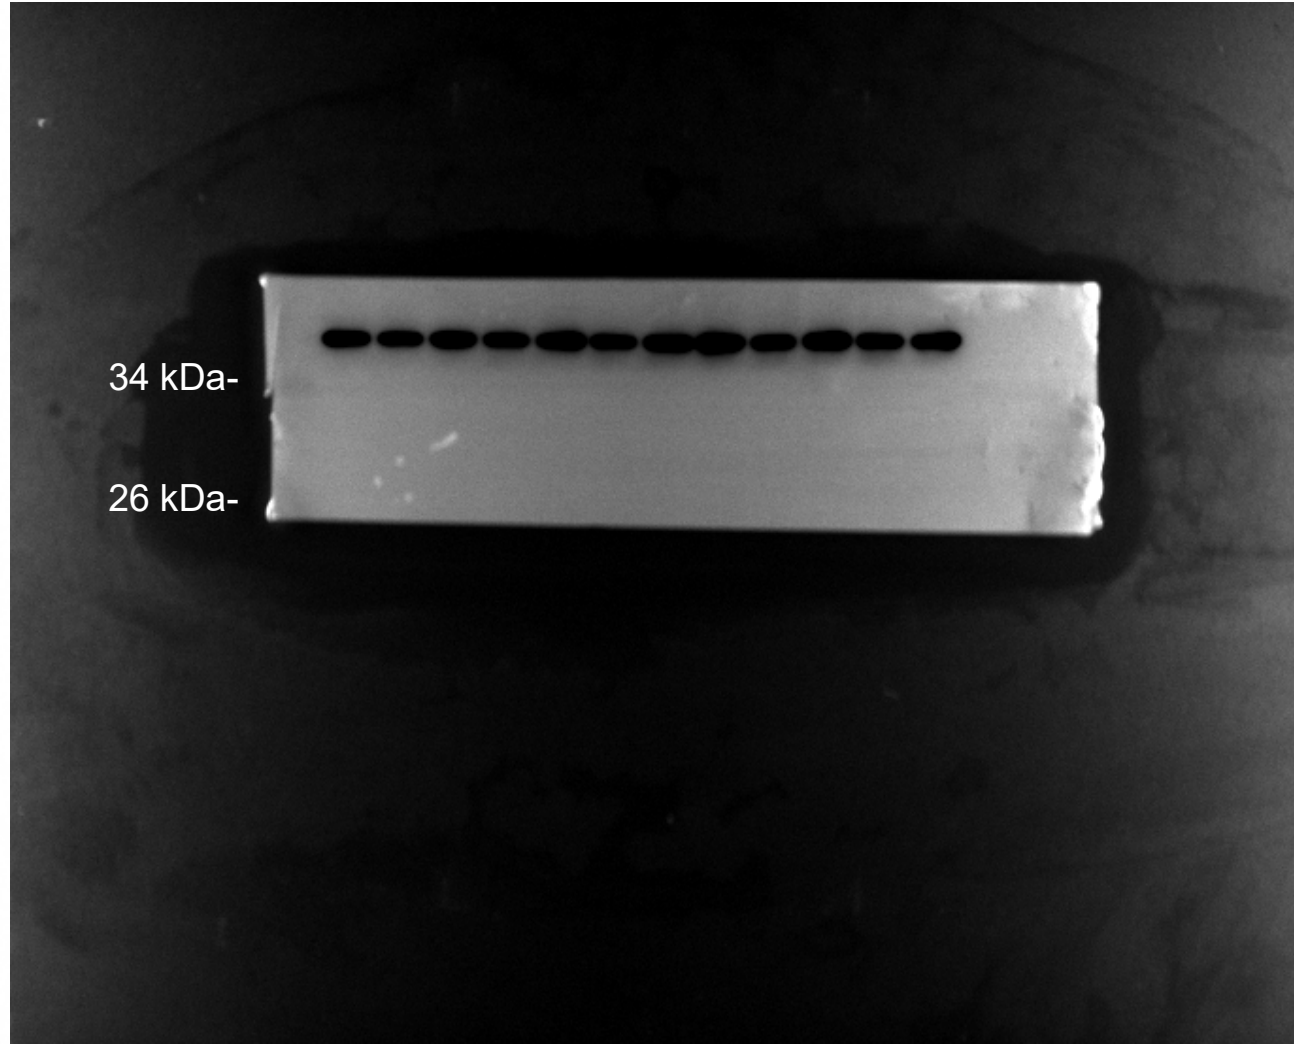

Blot of p-IKK $\alpha/\beta$  in Fig.5A

p-IKK $\alpha/\beta$   
(87 kDa)

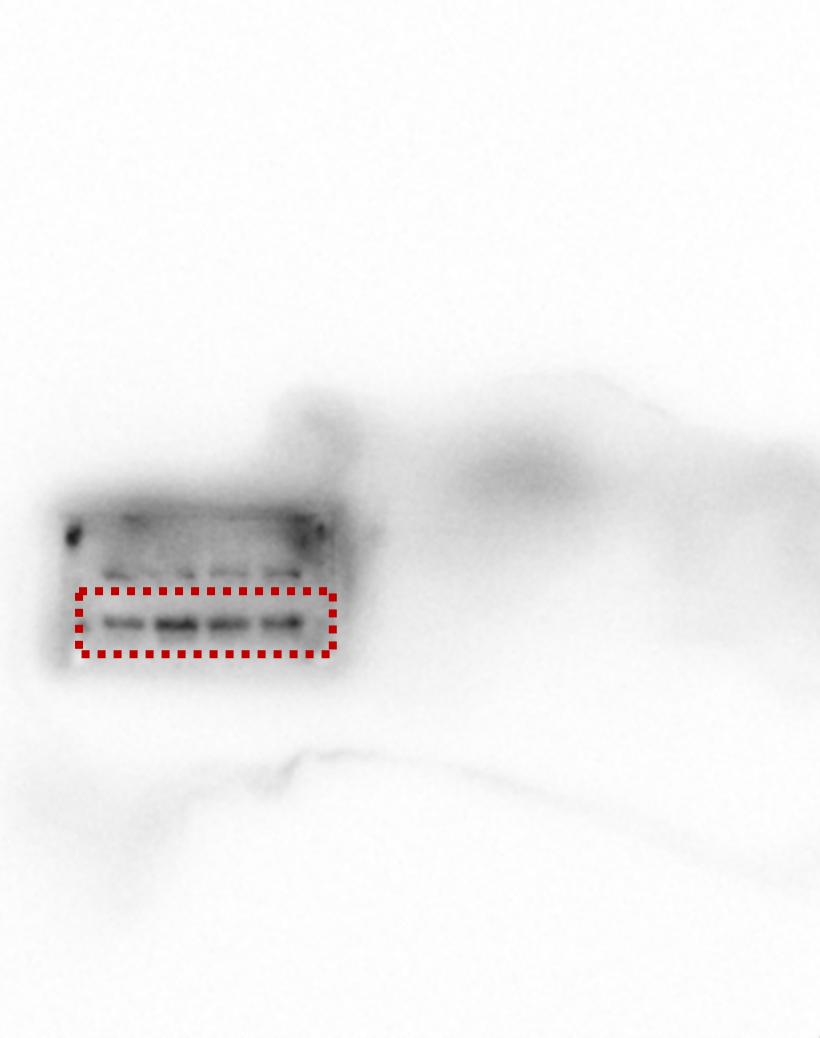

130 kDa-  
95 kDa-

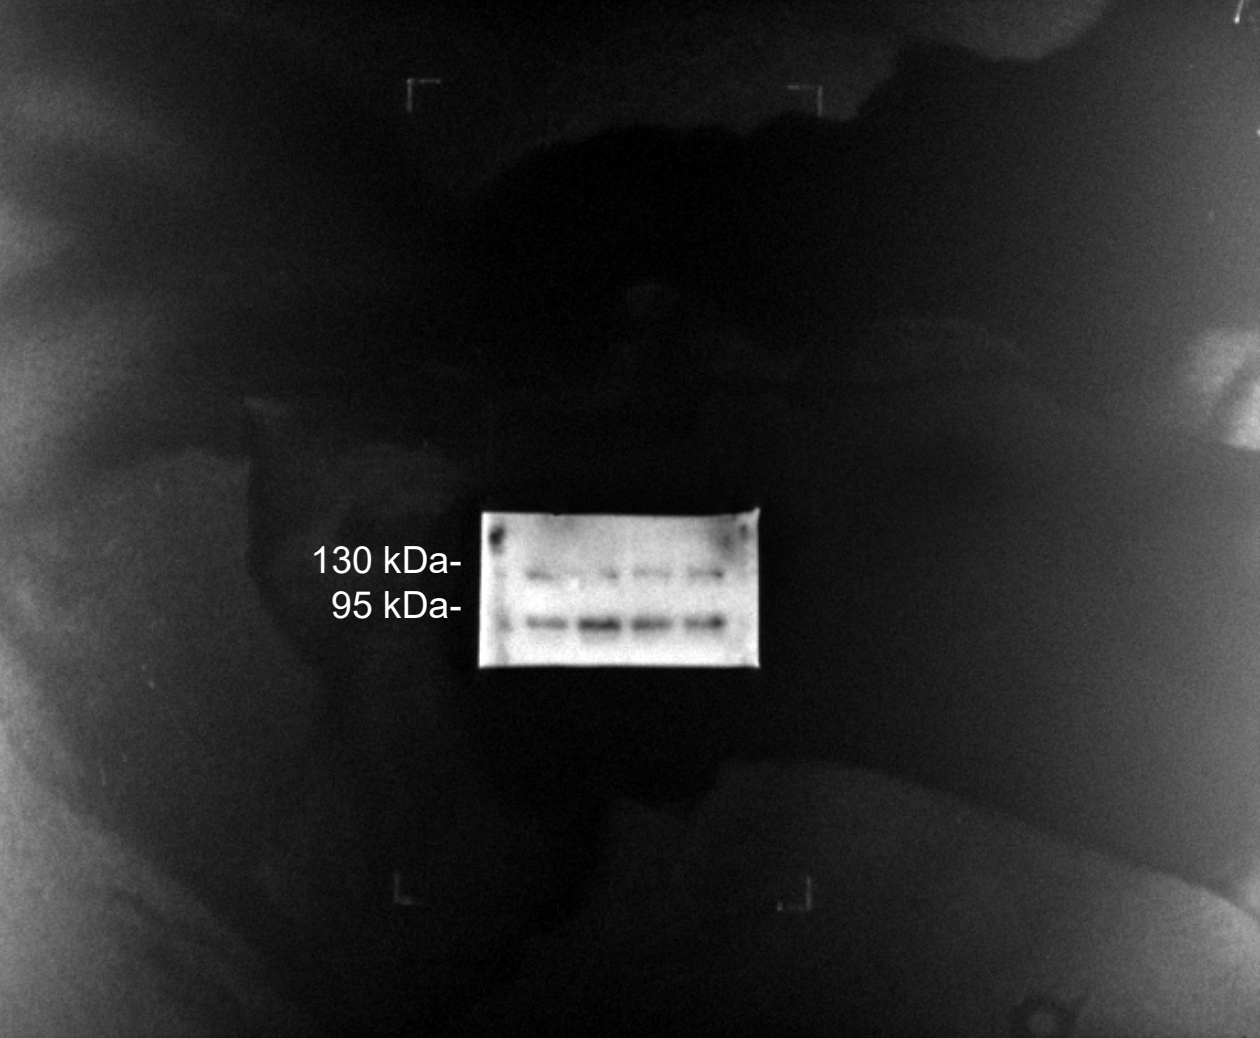

# Blot of IKK $\beta$ in Fig.5A

IKK $\beta$   
(87 kDa)

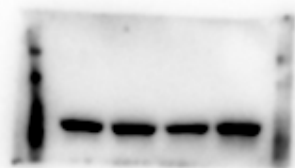

130 kDa-  
95 kDa-

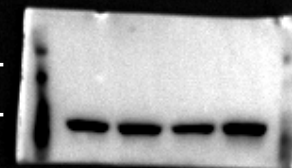

Blot of p-IκBα in Fig.5A

p-IκBα  
(41 kDa)

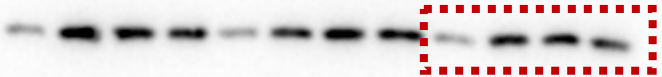

43 kDa-

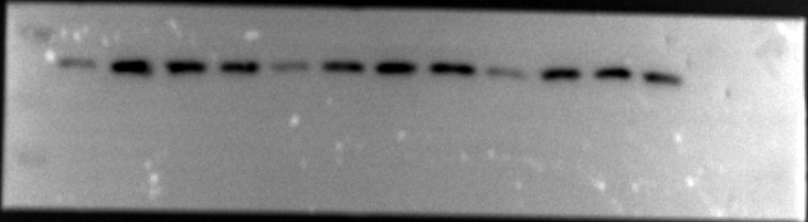



# Blot of I $\kappa$ B $\alpha$ in Fig.5A

I $\kappa$ B $\alpha$   
(41 kDa)

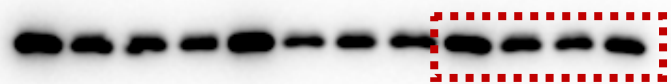

43 kDa-

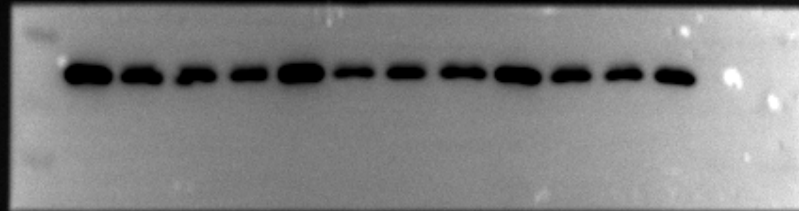

Blot of p-p65 in Fig.5A

p-p65  
(65 kDa)

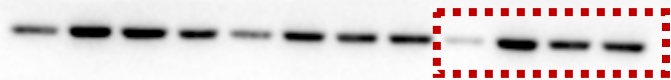

55 kDa-

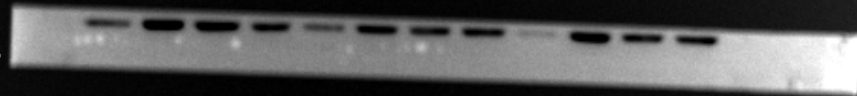

# Blot of p65 in Fig.5A

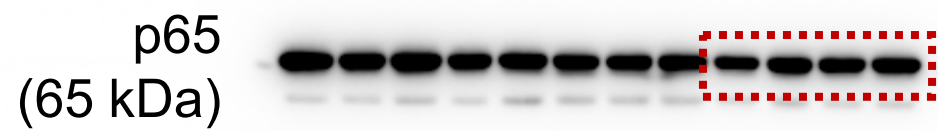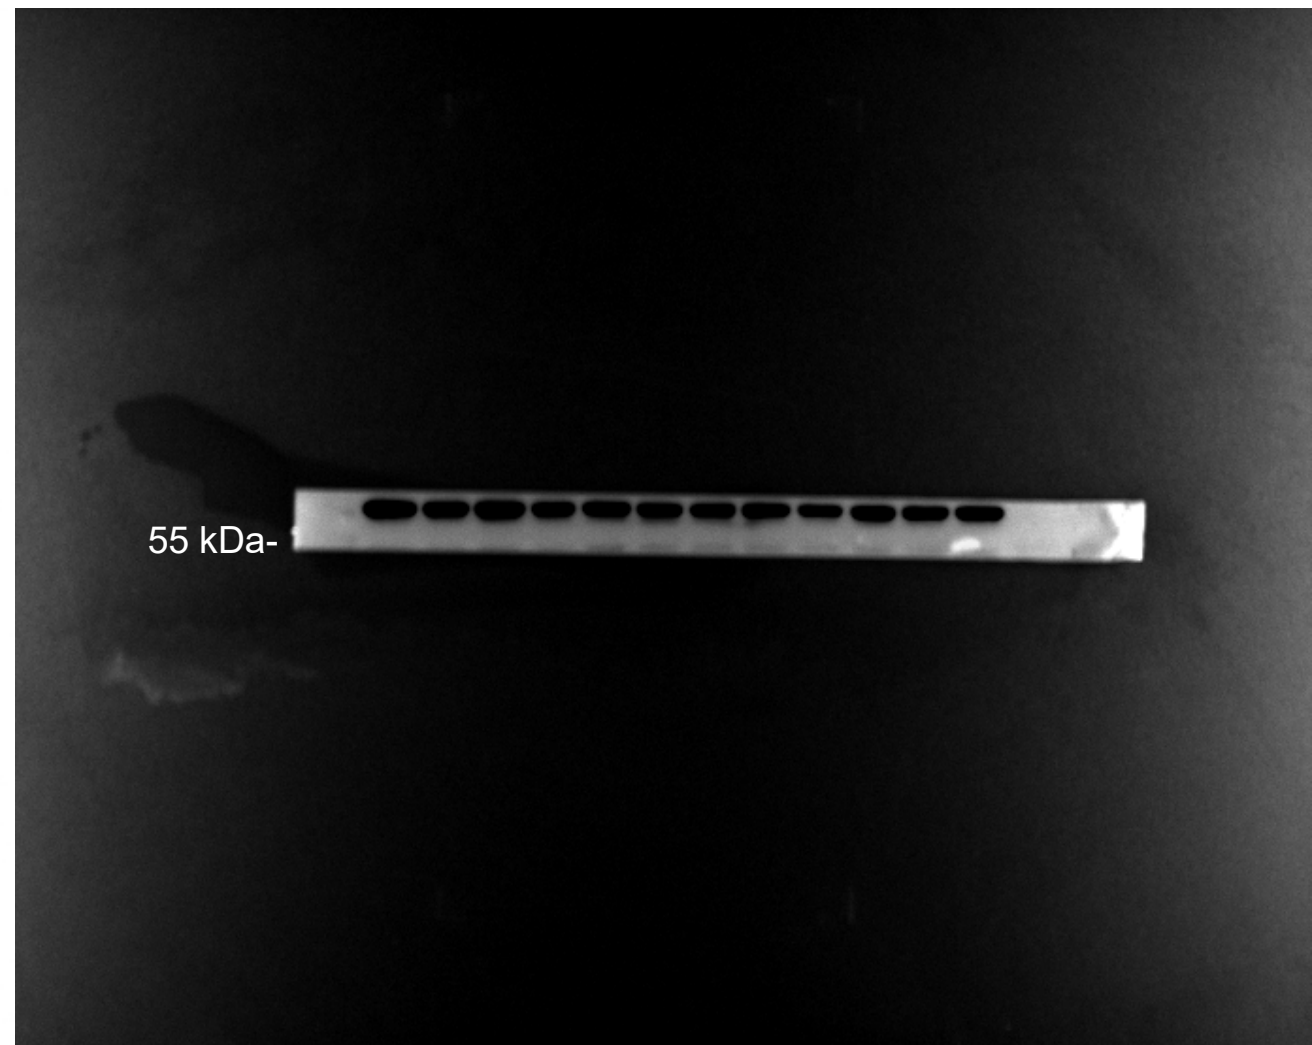



# Blot of p-IRF3 in Fig.5A

p-IRF3  
(55 kDa)

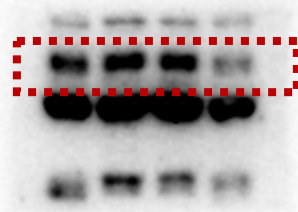

55 kDa-  
43 kDa-

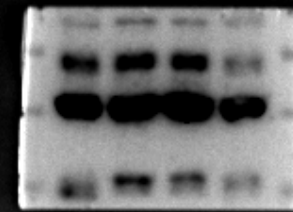

# Blot of IRF3 in Fig.5A

IRF3  
(55 kDa)

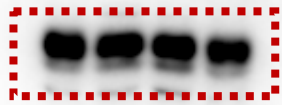

55 kDa-  
43 kDa-

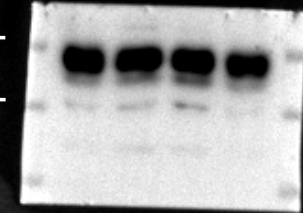

Blot of p-TBK1 in Fig.5A

p-TBK1  
(84 kDa)

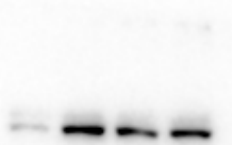

130 kDa-  
95 kDa-  
75 kDa-

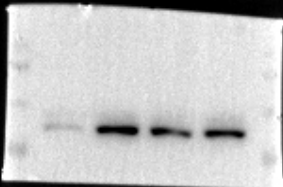

Blot of TBK1 in Fig.5A

TBK1  
(84 kDa)

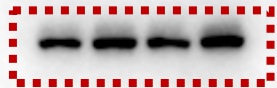

130 kDa-  
95 kDa-  
75 kDa-

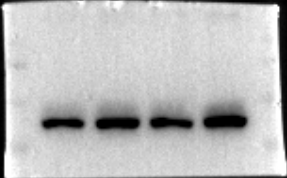



Blot of GAPDH (right) in Fig.5A

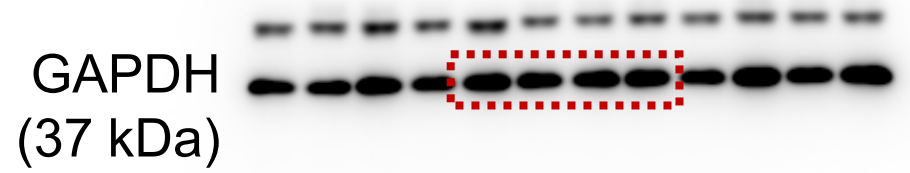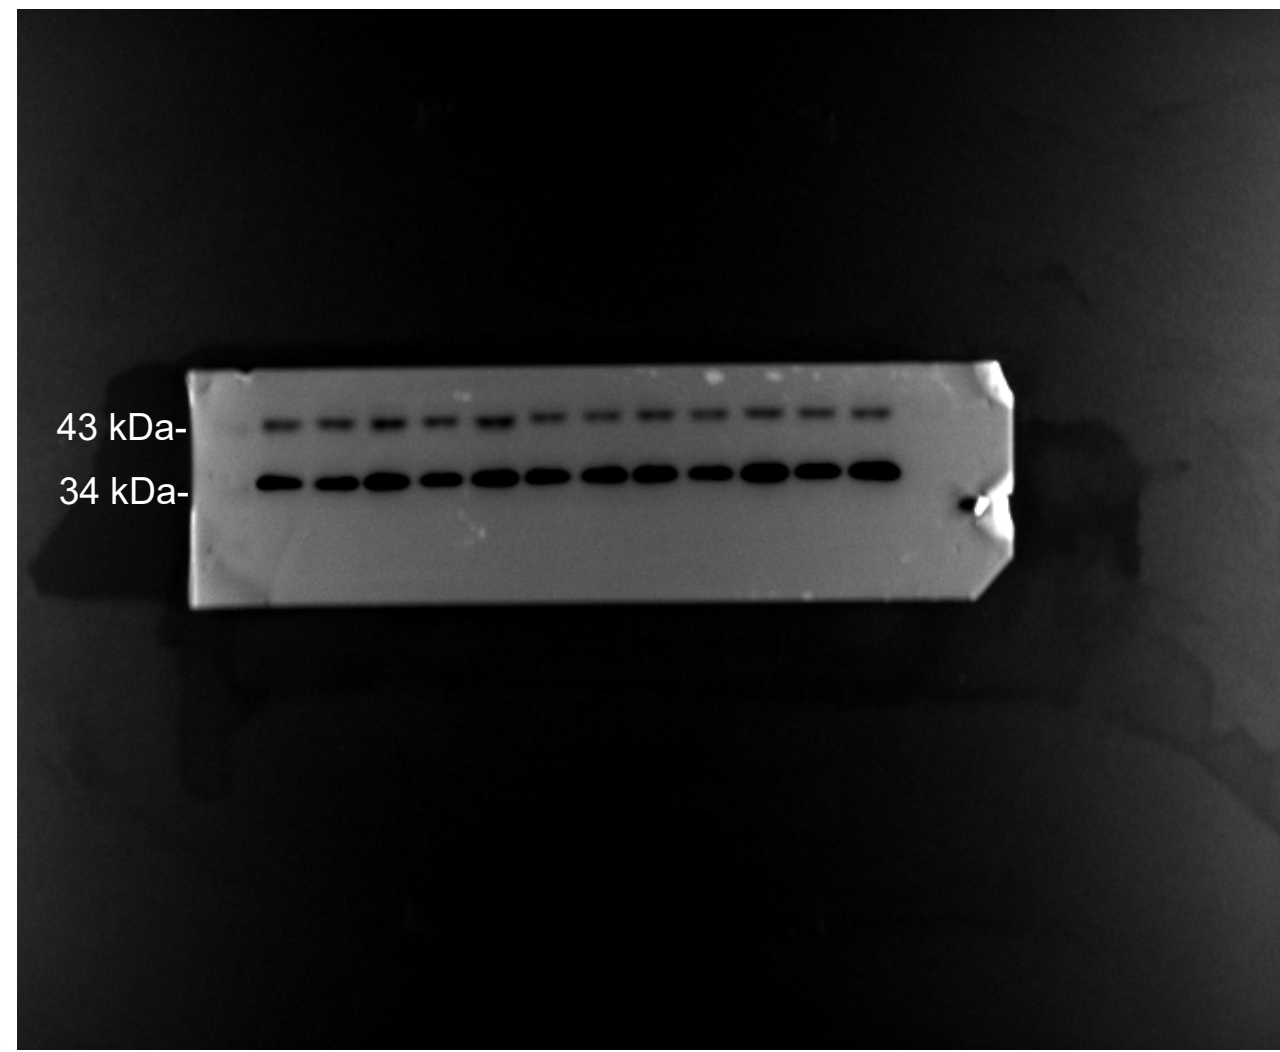

# Blot of nuclear c-Jun in Fig.6B

c-Jun  
(48 kDa)

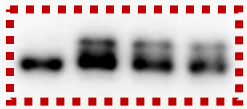

43 kDa-  
34 kDa-  
25 kDa-

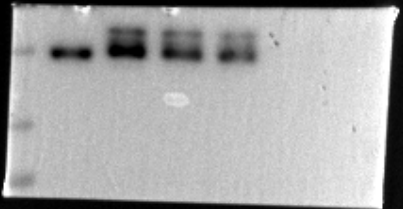

# Blot of nuclear p65 in Fig.6B

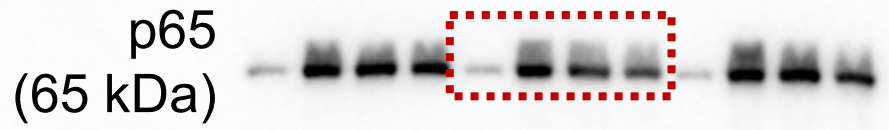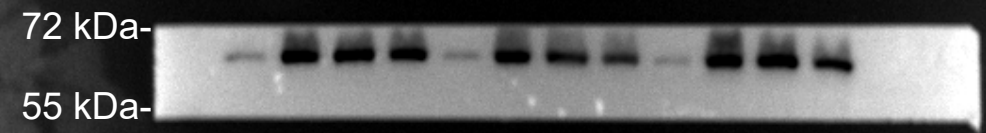



Blot of nuclear IRF3 in Fig.6B

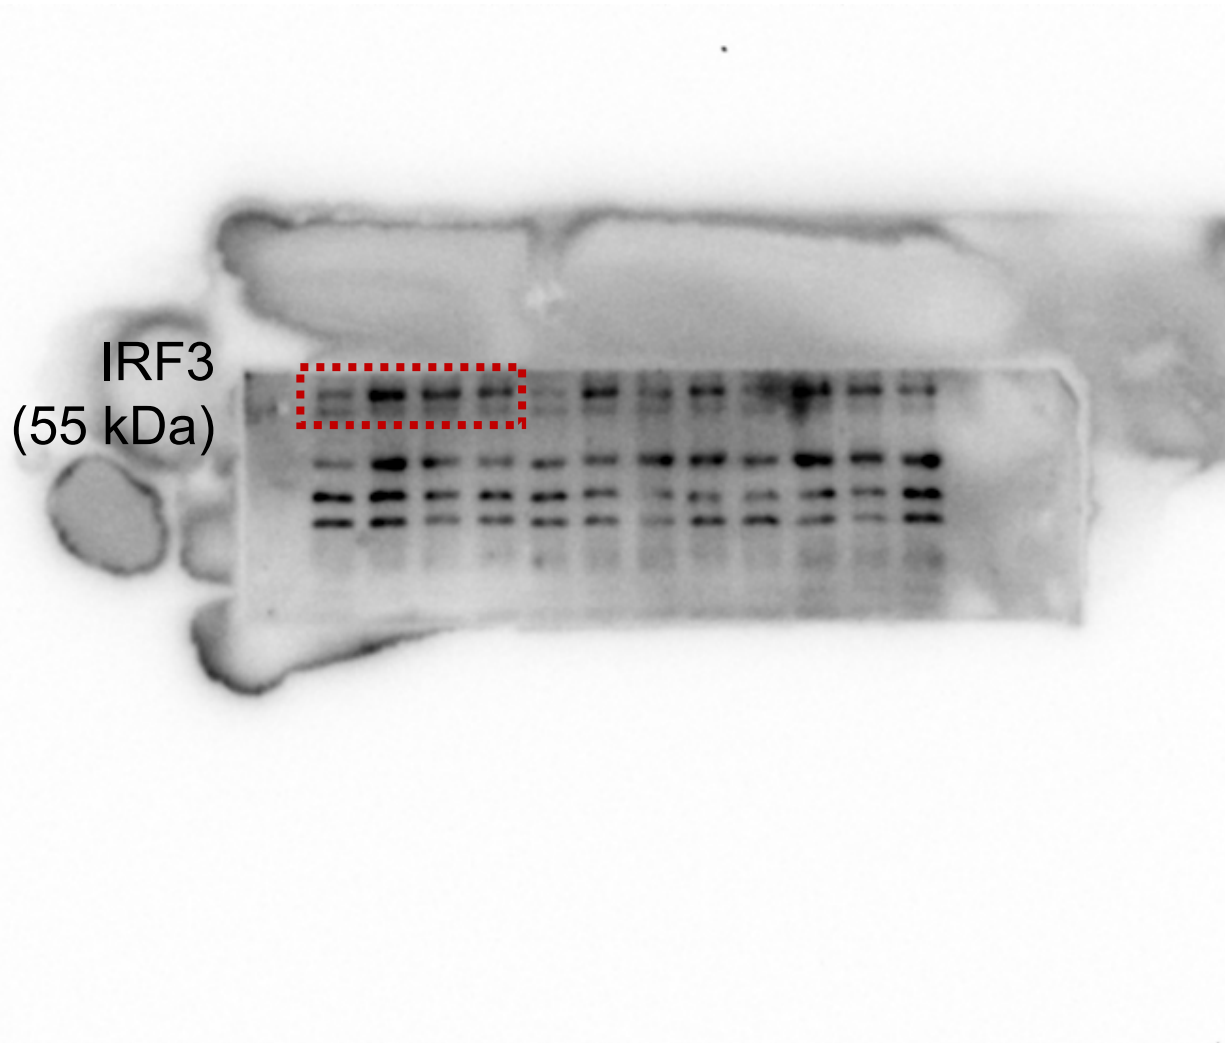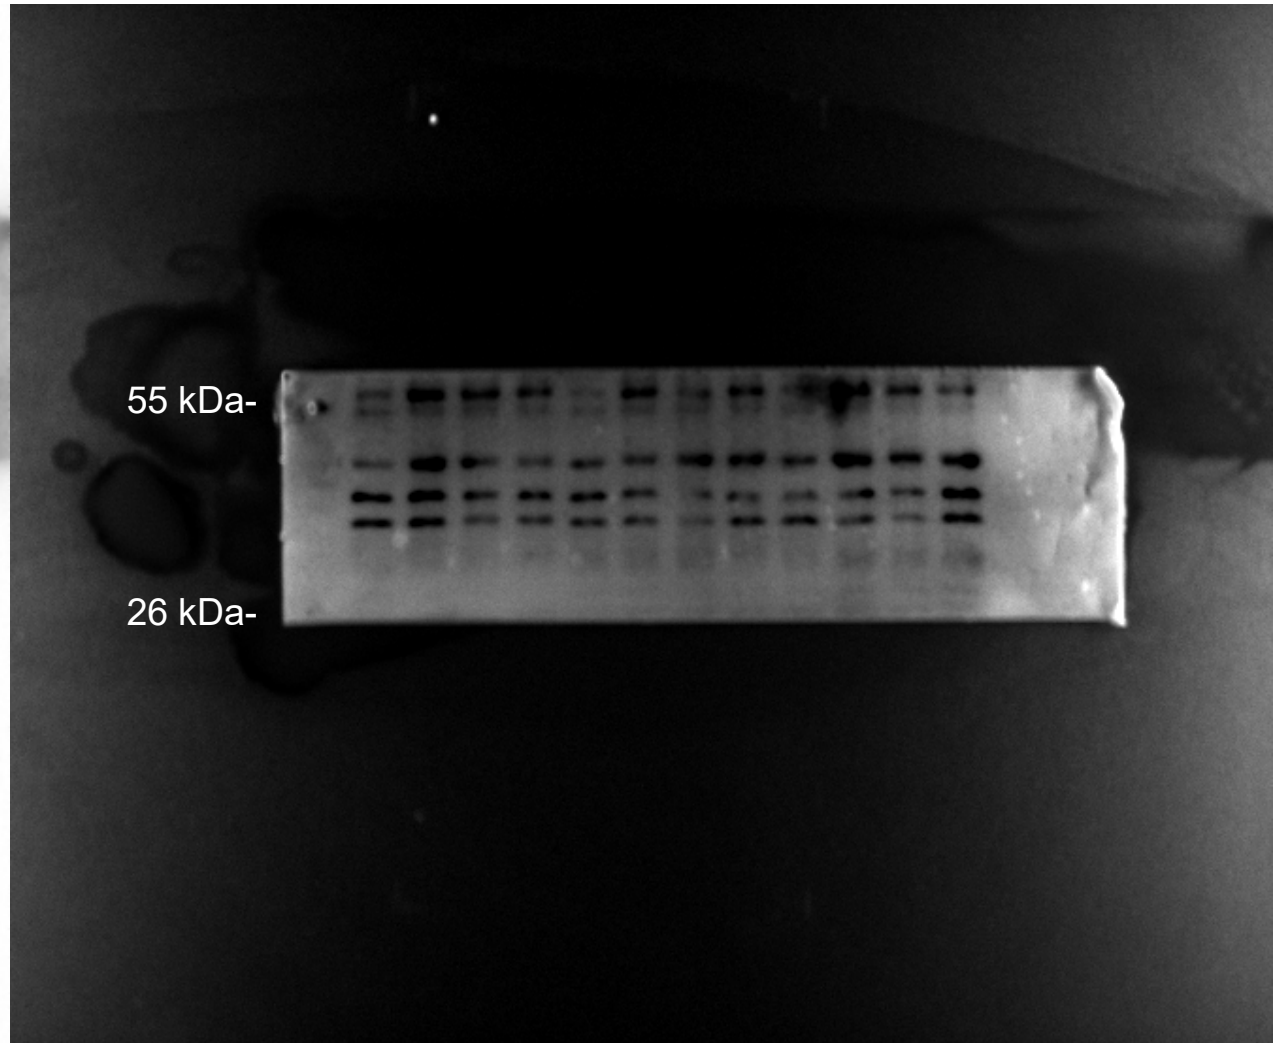

# Blot of nuclear Sp1 in Fig.6B

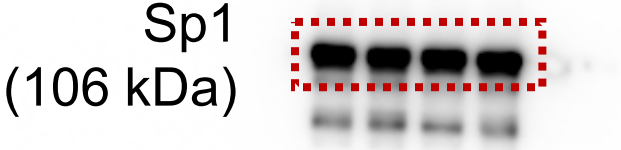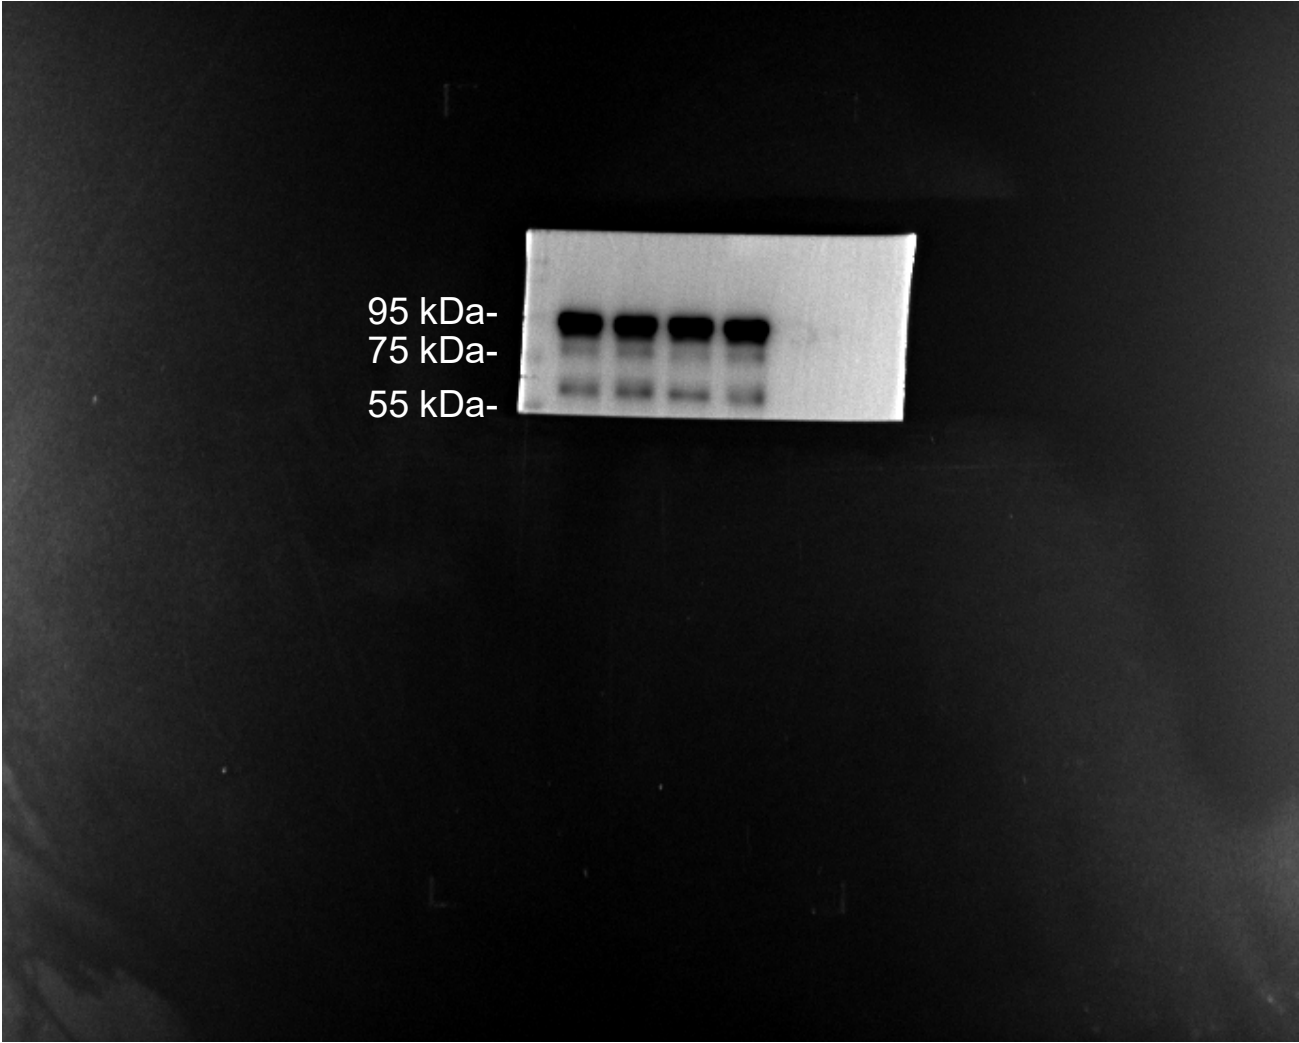

# Blot of cytoplasm c-Jun in Fig.6B

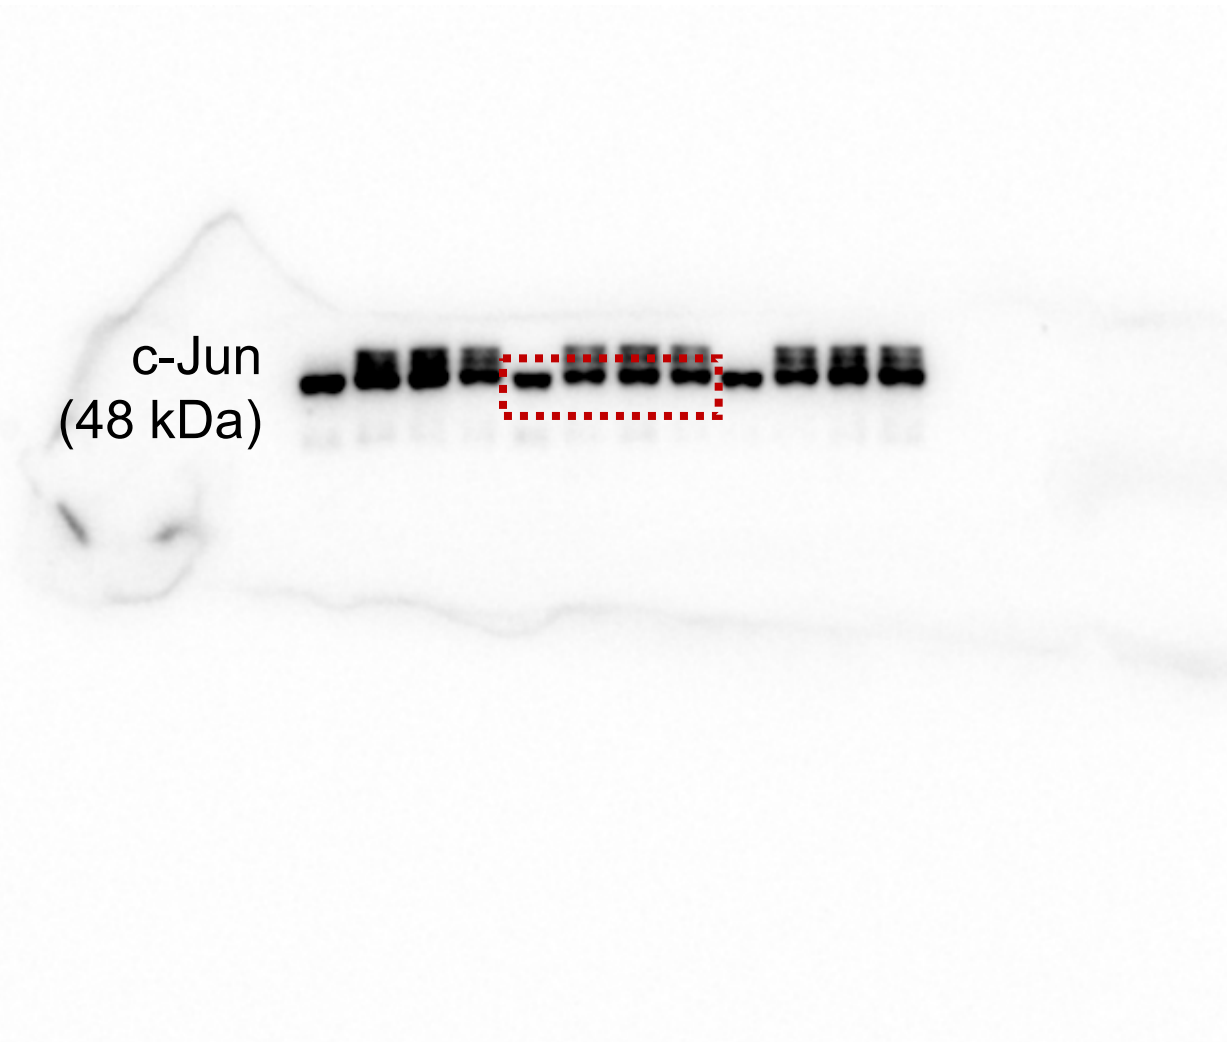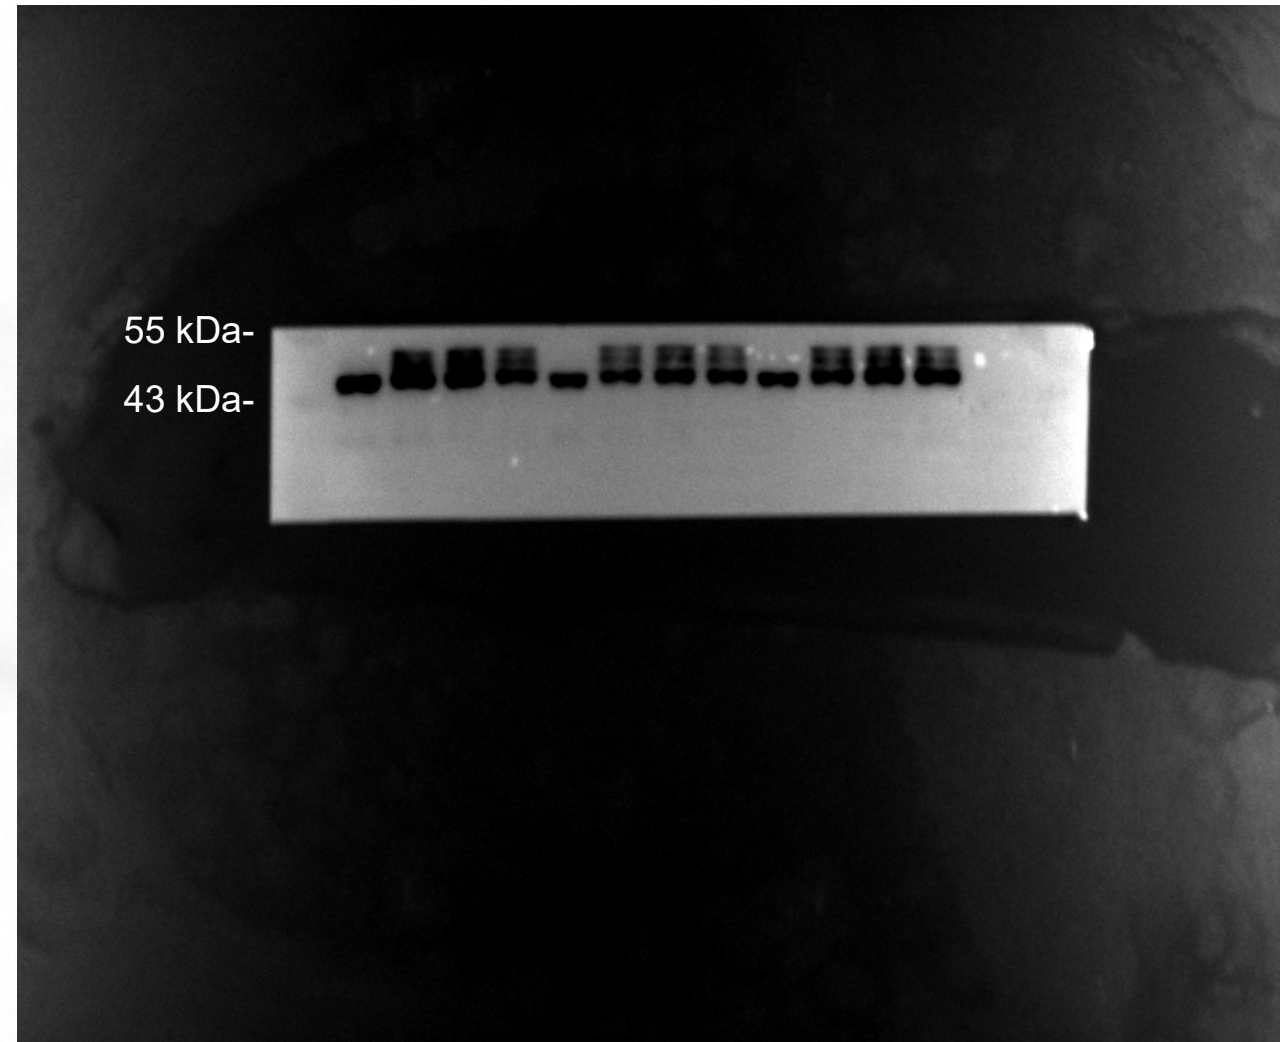

# Blot of cytoplasm p65 in Fig.6B

p65  
(65 kDa)

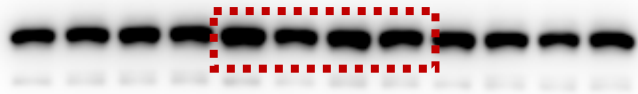

95 kDa-  
55 kDa-

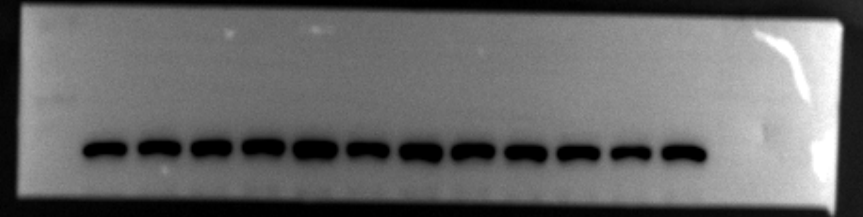



Blot of cytoplasm IRF3 in Fig.6B

IRF3  
(55 kDa)

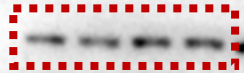

55 kDa-

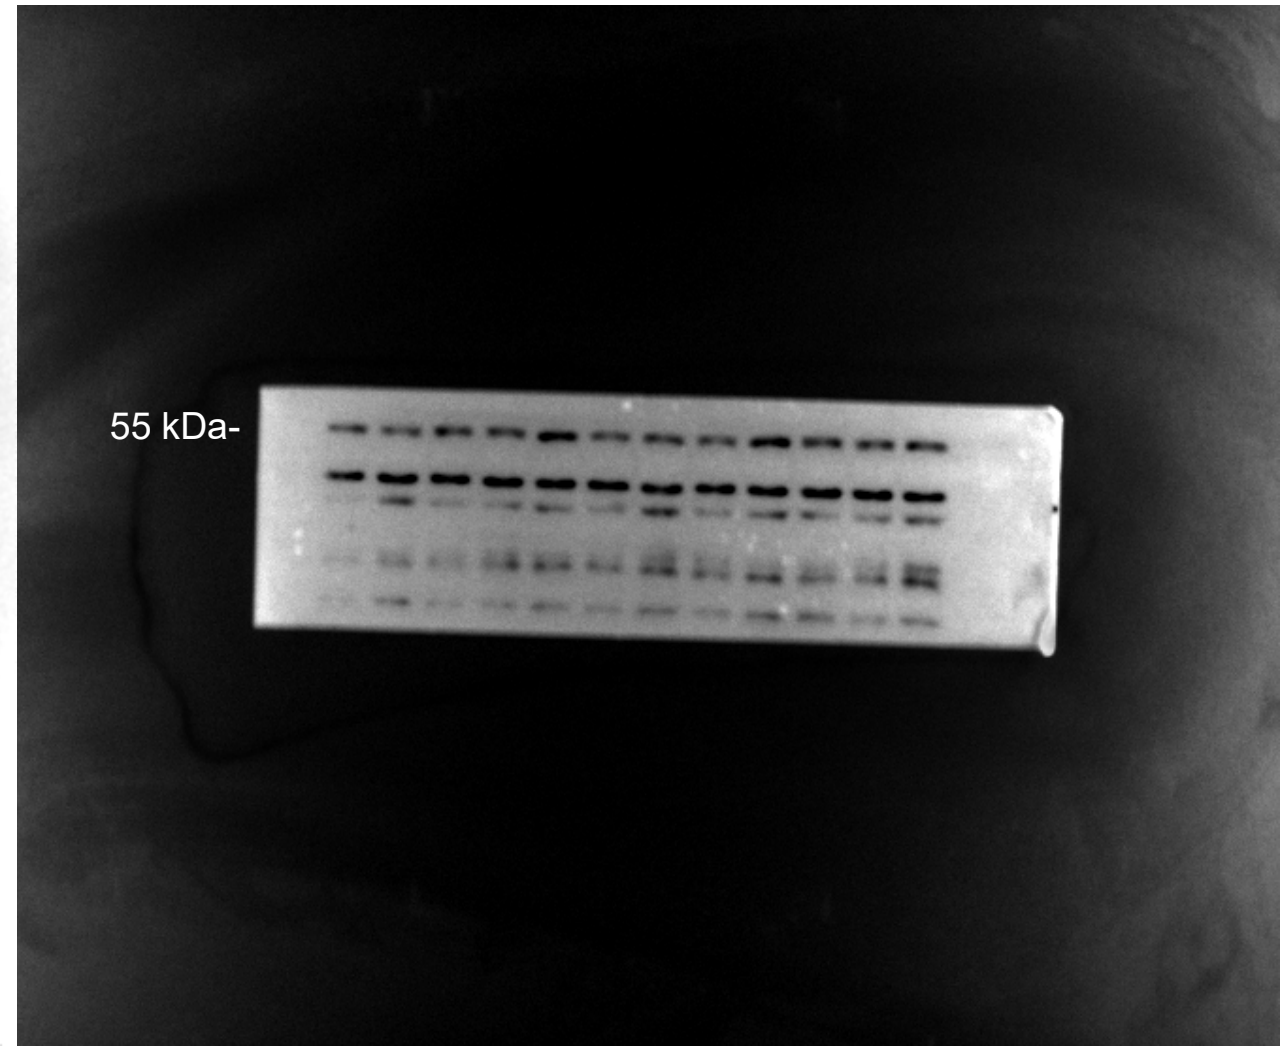

# Blot of cytoplasm GAPDH in Fig.6B

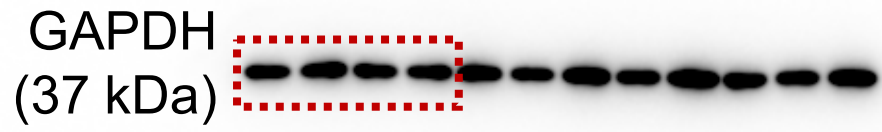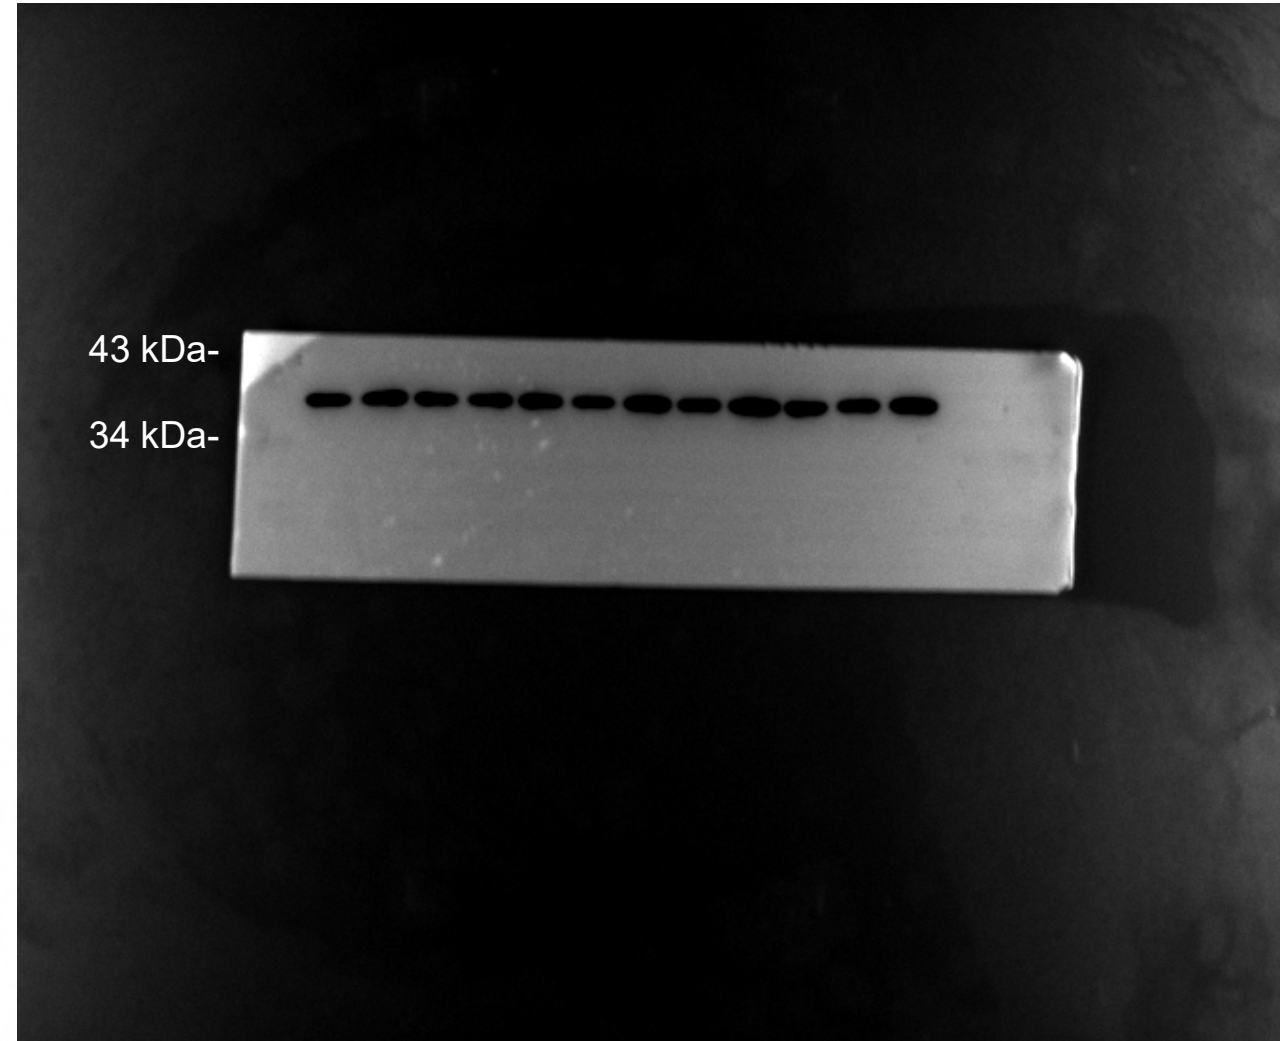

Supplement: Supplementary file 1 [file get_supplementary_file.php]
